# Supplementary material
Source: PubMed Central journal article supplement (PMC6420806)

**Supplemental table 1: Paired biopsies in 38 patients with site of biopsy and EGFR mutations identified**

| Patient | Site for MSK-IMPACT               | EGFR mutation          | Same site Y/N |
|---------|-----------------------------------|------------------------|---------------|
| 1       | Right side Pleura                 | L747_P753delinsS       | Y             |
|         | Right side Pleura                 | T790M+L747_P753delinsS |               |
| 2       | Left lower lobe lung              | E746_A750del           | Y             |
|         | Left lower lobe lung              | T790M+E746_A750del     |               |
| 3       | Left Lung                         | L858R                  | N             |
|         | Sacrum                            | L858R                  |               |
| 4       | Hilar Lymph node                  | L858R                  | N             |
|         | Liver                             | T790M+L858R            |               |
| 5       | Right lower lobe Lung             | L858R                  | Y             |
|         | Right lower lobe Lung             | L858R                  |               |
| 6       | Segment 6 Liver                   | L858R+V689M            | N             |
|         | Segment 6 Liver                   | L858R+V689M            |               |
|         | Left lateral segment Liver        | L858R+V689M            |               |
| 7       | Supraclavicular Lymph node (Left) | L858R+D761Y            | Y             |
|         | Supraclavicular Lymph node (Left) | T790M+L858R+D761Y      |               |
| 8       | Right lower lobe lung             | L858R+E709K            | Y             |
|         | Right lower lobe lung             | L858R                  |               |
| 9       | Pleura                            | E746_A750del           | N             |
|         | Lingula                           | T790M+E746_A750del     |               |
| 10      | Brain                             | L747_T751del           | N             |
|         | Paratracheal Lymph node           | L747_T751del           |               |
| 11      | Left upper lobe Lung              | L858R+T854S            | N             |
|         | Mediastinal Lymph node            | T790M+L858R+T854S      |               |
| 12      | Brain                             | E746_A750del           | N             |
|         | Left lower lobe lung              | T790M+E746_A750del     |               |
| 13      | Sacrum                            | E746_A750del           | N             |
|         | Right upper lobe Lung             | T790M+E746_A750del     |               |
| 14      | Paratracheal Lymph node           | E746_A750del           |               |

|    |                                   |                    |   |
|----|-----------------------------------|--------------------|---|
|    | Right upper lobe Lung             | E746_A750del       | N |
| 15 | Subcarinal Lymph node             | E709_T710delinsD   | N |
|    | Left upper lobe Lung              | E709_T710delinsD   |   |
| 16 | Left Pleura                       | E746_A750del       | N |
|    | Left upper lobe Lung              | T790M+E746_A750del |   |
| 17 | Paratracheal Lymph node           | L858R+D1014V       | N |
|    | Supraclavicular Lymph node (Left) | L858R+D1014V       |   |
| 18 | Brain                             | E746_A750del       | N |
|    | Right lower lobe Lung             | T790M+E746_A750del |   |
| 19 | Left upper lobe Lung              | L858R+E709K        | N |
|    | Pericardium                       | L858R+E709K        |   |
| 20 | Left lower lobe Lung              | E709_T710delinsD   | N |
|    | Right upper lobe Lung             | E709_T710delinsD   |   |
| 21 | Subcarinal Lymph node             | L858R              | N |
|    | Liver                             | L858R              |   |
| 22 | Right Pleura                      | EGFR-KDD           | N |
|    | Right lower lobe Lung             | EGFR-KDD KRAS      |   |
| 23 | Right upper lobe Lung             | T790M+L858R        | N |
|    | Pleural fluid                     | L858R              |   |
| 24 | Paratracheal Lymph node           | EGFR-KDD           | N |
|    | Rib (bone)                        | EGFR-KDD           |   |
| 25 | Right upper lobe Lung             | E746_A750del       | N |
|    | Right bronchus intermedius        | E746_A750del       |   |
| 26 | T11 bone                          | E746_A750del       | N |
|    | Right upper lobe Lung             | E746_A750del       |   |
| 27 | Right lower lobe Lung             | E746_A750del       | N |
|    | Pleural fluid                     | E746_A750del       |   |
| 28 | Right Paratracheal Lymph node     | L858R              | N |
|    | Right Axillary Lymph node         | T790M+L858R        |   |
| 29 | Level 11R Lymph Node              | E746_A750del       | N |
|    | Left upper lobe Lung              | T790M+E746_A750del |   |
| 30 | Right ischiorectal mass           | E746_A750del       | N |
|    | Left upper lobe Lung              | E746_A750del       |   |

|    |                                  |                        |   |
|----|----------------------------------|------------------------|---|
| 31 | Pleural fluid                    | E746_A750del           | N |
|    | Omentum                          | T790M+E746_A750del     |   |
| 32 | Left Pleura                      | E709_T710delinsD       | N |
|    | Right Pleural Fluid              | E709_T710delinsD       |   |
| 33 | Right Pleura                     | L858R                  | N |
|    | Right upper lobe Lung            | L858R                  |   |
| 34 | Brain                            | K745_E746insVPAIK      | N |
|    | Right upper lobe Lung            | K745_E746insVPAIK      |   |
| 35 | L1 epidural tumor                | L858R                  | N |
|    | Right Iliac Bone                 | L858R                  |   |
| 36 | Right lower lobe Lung            | L747_P753delinsS+A755G | N |
|    | Left Proximal Femur              | L747_P753delinsS+A755G |   |
| 37 | Right Paratracheal Lymph node    | E746_T751delinsA       | N |
|    | Right Supraclavicular Lymph node | T790M+E746_T751delinsA |   |
| 38 | Left upper lobe Lung             | T790M+E746_A750del     | N |
|    | Liver                            | E746_A750del           |   |

Supplementary Table 2: Alterations detected in 38 patients that had paired samples assessed by IMPACT prior and upon resistance to EGFR-TKI therapy

| Pt | Baseline             |            |                                                                                                                                    | Acquired |        |                                                                            |      |                                                                                |
|----|----------------------|------------|------------------------------------------------------------------------------------------------------------------------------------|----------|--------|----------------------------------------------------------------------------|------|--------------------------------------------------------------------------------|
|    | EGFR                 | Concurrent |                                                                                                                                    | T790M    | Gained |                                                                            | Lost |                                                                                |
| 1  | Ex19del              | Mtn        | L747_P753delinsS, TP53 E298*, PDGFRA R804Q, SETD2 T1641Kfs*27                                                                      | Positive | Mtn    | T790M                                                                      | Mtn  |                                                                                |
|    |                      | Amp        | EGFR (11.6 vs 11.5), MYC (2.4 vs 2.2), RECLQL4 (2.1 vs 2.1), RB1 del (-6.6 vs -3.3)                                                |          | Amp    | ERBB2 (2.7), SDHA (2.1), TERT (2.1), IL7R (2.1), RICTOR (2.1), RAD21 (2.2) | Amp  |                                                                                |
|    |                      | Del        |                                                                                                                                    |          | Del    |                                                                            | Del  |                                                                                |
| 2  | L858R                | Mtn        | TP53 A159P, SMAD2 P221S, L858R                                                                                                     | Positive | Mtn    | T790M                                                                      | Mtn  |                                                                                |
|    |                      | Amp        | FGFR1 (2.0), NKX2-1 (2.3), FOXA1 (2.3), CCNE1 (3.3), AKT2 (4.7)                                                                    |          | Amp    |                                                                            | Amp  | FGFR, NKX2-1, FOXA1, CCNE1, AKT2                                               |
|    |                      | Del        |                                                                                                                                    |          | Del    |                                                                            | Del  |                                                                                |
| 3  | V689M<br>L858R       | Mtn        | L858R, TP53 P36fs, FGFR3 R399C, AR G578*, ATRX S784F, BARD1 N73S, EPHA3 F152S, SMARCA4 P1277L                                      |          | Mtn    | IDH1 R132G                                                                 | Mtn  | ATRX S784F, BARD1 N73S, EPHA3 F152S SMARCA4 P1277L                             |
|    |                      | Amp        |                                                                                                                                    |          | Amp    | YES1 (2.2)                                                                 | Amp  |                                                                                |
|    |                      | Del        |                                                                                                                                    |          | Del    |                                                                            | Del  |                                                                                |
| 4  | L858R<br>D761Y       | Mtn        | L858R, D761Y, PTEN R233*, CTNNB1 S33F                                                                                              | Positive | Mtn    | T790M                                                                      | Mtn  |                                                                                |
|    |                      | Amp        | AURKA (2.9 v 1.8), TERT (2.2 v 2.0), GNAS (2.9 v 1.8), SDHA (2.9 v 2.0), PTPRT (2.9 v 2.1), MCL1 (2.3), RIT1 (2.3), DIS3 (2.2)     |          | Amp    |                                                                            | Amp  | MCL1, RIT1, DIS3                                                               |
|    |                      | Del        |                                                                                                                                    |          | Del    |                                                                            | Del  |                                                                                |
| 5  | L858R<br>E709K       | Mtn        | L858R, E709K, TP53 M273I, CARD11 E1080Q, MSH2 F58L                                                                                 |          | Mtn    | ATR E1986K, NOTCH2 L395V, RAD50 E620K, MST1R G886V                         | Mtn  | EGFR E709K, MSH2                                                               |
|    |                      | Amp        | CCNE1 (1.9 vs 5.4), EGFR (1.6 vs 2.8)                                                                                              |          | Amp    | ERBB2 (22.7), AKT2 (3.2), CDK12 (3.7), IKZF1 (2.8), CEBPA (3.2)            | Amp  |                                                                                |
|    |                      | Del        |                                                                                                                                    |          | Del    |                                                                            | Del  |                                                                                |
| 6  | L858R<br>T854S       | Mtn        | L858R +T854S, TP53 ex7 splice, PBMR1 N110fs, PTEN L247fs, NTRK3 R306H, RB1 V654M                                                   | Positive | Mtn    | T790M, SMARCA4 D1114H, HLA-A E197fs                                        | Mtn  | RB1 V654M                                                                      |
|    |                      | Amp        |                                                                                                                                    |          | Amp    |                                                                            | Amp  |                                                                                |
|    |                      | Del        |                                                                                                                                    |          | Del    |                                                                            | Del  |                                                                                |
| 7  | Ex19del              | Mtn        | E746_A750del, TP53 C275W, RB1, TET1 Q638P, GNAS K25N, STAG2 M498I, GNA11 R210L                                                     | Positive | Mtn    | T790M                                                                      | Mtn  | GNAS K25N, GNA11 R210L                                                         |
|    |                      | Amp        | EGFR (2.2), RAC1 (2.4), PMS2 (2.5), FOXA1 (3.2), NKX2-1 (3.2)                                                                      |          | Amp    |                                                                            | Amp  | PMS2, RAC1, EGFR                                                               |
|    |                      | Del        | PTEN (-8,4)                                                                                                                        |          | Del    |                                                                            | Del  | PTEN                                                                           |
| 8  | L858R<br>+<br>D1014V | Mtn        | L858R+D1014V, TP53 R280I, JAK2 S1035L, ATRX D1287E, B2M M1T, EPHA5 G838R, TSC2 S1130C,PALB2 P358L, ARAF E98*,CRLF2 D87N, RAD21 L8V |          | Mtn    |                                                                            | Mtn  | B2M M1T, EPHA5 G838R, TSC2 S1130C,PALB2 P358L, ARAF E98*,CRLF2 D87N, RAD21 L8V |
|    |                      | Amp        |                                                                                                                                    |          | Amp    |                                                                            | Amp  |                                                                                |
|    |                      | Del        |                                                                                                                                    |          | Del    |                                                                            | Del  |                                                                                |
| 9  | L858R                | Mtn        | L858R, TP53 C238R, STK11 (Q100*), TGFBR2 R485H, E2F3 Q302E, NEGR1 T117A, IGF1R E1162Q                                              |          | Mtn    | STK11(S69*), MDM4 Q9H                                                      | Mtn  |                                                                                |

|    |         |     |                                                                                                                                                            |          |     |                                                                                                     |     |                                       |
|----|---------|-----|------------------------------------------------------------------------------------------------------------------------------------------------------------|----------|-----|-----------------------------------------------------------------------------------------------------|-----|---------------------------------------|
|    |         | Amp | TERT (2.7 v 3.6), SDHA (2.7 v 3.6), EGFR (5.0)                                                                                                             |          | Amp | MDM4 (2.1), RIT1 (2.7)                                                                              | Amp | EGFR                                  |
|    |         | Del |                                                                                                                                                            |          | Del | KEAP1 Del                                                                                           | Del |                                       |
| 10 | Ex19del | Mtn | E746_A750del, TP53 F328fs, <i>NF1 Q2723R</i> , <i>PTPRS A1115T</i> , <i>SMO R512L</i> , <i>CRKL V281I</i>                                                  |          | Mtn | <i>NOTCH2 R1931C</i>                                                                                | Mtn |                                       |
|    |         | Amp |                                                                                                                                                            |          | Amp |                                                                                                     | Amp |                                       |
|    |         | Del |                                                                                                                                                            |          | Del |                                                                                                     | Del |                                       |
| 11 | Ex19del | Mtn | E746_A750del, PIK3CA E545K, TP53 P177_C182del, <i>SETD2T2316A</i>                                                                                          |          | Mtn |                                                                                                     | Mtn | <i>EPHB1 E144K</i>                    |
|    |         | Amp | EGFR (1.9 v 1.3)                                                                                                                                           |          | Amp | MET (1.7)                                                                                           | Amp |                                       |
|    |         | Del |                                                                                                                                                            |          | Del |                                                                                                     | Del |                                       |
| 12 | Ex19del | Mtn | E746_AT750del, TP53 R248Q                                                                                                                                  | Positive | Mtn | <i>T790M</i> , <i>CREBBP V^722E</i> , <i>MDC1 E952Q</i> , <i>PTPN11 M355I</i> , <i>FAM46C A232T</i> | Mtn |                                       |
|    |         | Amp |                                                                                                                                                            |          | Amp | EGFR (3.3)                                                                                          | Amp |                                       |
|    |         | Del |                                                                                                                                                            |          | Del |                                                                                                     | Del |                                       |
| 13 | Ex19del | Mtn | E746_A750del                                                                                                                                               | Positive | Mtn | T790M                                                                                               | Mtn |                                       |
|    |         | Amp | CDK4 (4.9 v 3.4), MDM2 (5.0 v 3.4)                                                                                                                         |          | Amp |                                                                                                     | Amp |                                       |
|    |         | Del |                                                                                                                                                            |          | Del |                                                                                                     | Del |                                       |
| 14 | Ex19del | Mtn | E746_A750del, TP53 V272_R273insL, PIK3CA N345K, <i>JAK3 S1000*</i>                                                                                         | Positive | Mtn | T790M                                                                                               | Mtn |                                       |
|    |         | Amp | GNAS (1.8)                                                                                                                                                 |          | Amp |                                                                                                     | Amp | GNAS (1.8)                            |
|    |         | Del |                                                                                                                                                            |          | Del |                                                                                                     | Del |                                       |
| 15 | L858R   | Mtn | L858R, TP53 H179L, H214R                                                                                                                                   |          | Mtn | MET S22N                                                                                            | Mtn |                                       |
|    |         | Amp | EGFR (1.7)                                                                                                                                                 |          | Amp |                                                                                                     | Amp | EGFR (1.7)                            |
|    |         | Del |                                                                                                                                                            |          | Del |                                                                                                     | Del |                                       |
| 16 | Ex19del | Mtn | <b>TP53 R342P, RB1 Ex12 splicing variant, E746_A750del, BCOR E1096K, MDC1 D221N, NFE2L2 D321N</b>                                                          | Positive | Mtn | <b>T790M, PIK3CA E545K, IKZF1 R511Q (Small cell transformation)</b>                                 | Mtn | <b>BCOR,MDC, NFE2L2 PIK3CA M1043I</b> |
|    |         | Amp |                                                                                                                                                            |          | Amp |                                                                                                     | Amp |                                       |
|    |         | Del | <b>PTPRT (-2.2),TOP1 (-2.2), SRC (-2.2),NCOA3 (-2.2)</b>                                                                                                   |          | Del |                                                                                                     | Del | <b>NCOA3</b>                          |
| 17 | Ex19del | Mtn | L747_T751del, TP53 V173*, <i>SMARCA4 G243_P244dup</i> , <i>HGFY259C</i>                                                                                    |          | Mtn | TP53 G334W, AGK-BRAF fusion                                                                         | Mtn |                                       |
|    |         | Amp | FOXA1 (5.0 v 2.1), EGFR (10.2 v 2.3), NKX2-1 (5.0 v 2.1)                                                                                                   |          | Amp |                                                                                                     | Amp |                                       |
|    |         | Del | CDKN2A (-3.1) KDM5C (-2.1), CDKN2B (-3.1)                                                                                                                  |          | Del |                                                                                                     | Del | CDKN2A, KDM5C, CDKN2B                 |
| 18 | Ex19del | Mtn | E746_A750del, TP53 R248G, RB1 L337fs                                                                                                                       | Positive | Mtn | <i>T790M</i> , <i>TGFBR1 A24_A26del</i> , <i>CDKN1A T97I</i> , <i>NEGR1 S331F</i>                   | Mtn |                                       |
|    |         | Amp | SDHA (2.4)                                                                                                                                                 |          | Amp | EGFR (2.2)                                                                                          | Amp | SDHA                                  |
|    |         | Del |                                                                                                                                                            |          | Del |                                                                                                     | Del |                                       |
| 19 | Ex18del | Mtn | E709_T710delinsD, NTRK3 Y376C, PTPRT V1085I                                                                                                                |          | Mtn | PIK3CA E542K, <i>KMT2C Y3879C</i> , <i>ATRX G630V</i>                                               | Mtn | <i>PTPRT</i>                          |
|    |         | Amp |                                                                                                                                                            |          | Amp | EGFR (2.3)                                                                                          | Amp |                                       |
|    |         | Del |                                                                                                                                                            |          | Del |                                                                                                     | Del |                                       |
| 20 | Ex18del | Mtn | E709_T710delinsD, PIK3CA E545K, ARID2 ex3 splicing variant, RBM10 E280*, <i>MED12 Ex37 splice</i> , <i>AMER1 E283*</i> , <i>CSF1R Q764P</i> , <i>KMT2C</i> |          | Mtn |                                                                                                     | Mtn | <i>KMT2C</i>                          |

|    |             | <i>P828L</i> |                                                                                                                            |          |     |                                                                                                                                                        |     |                                                                  |
|----|-------------|--------------|----------------------------------------------------------------------------------------------------------------------------|----------|-----|--------------------------------------------------------------------------------------------------------------------------------------------------------|-----|------------------------------------------------------------------|
|    |             | Amp          | EGFR (V 4.2), RAC1 (2.1), ETV1 (2.0), PMS2 (2.2)                                                                           |          | Amp | IKZF1 (2.2)                                                                                                                                            | Amp | RAC1, ETV1, PMS2                                                 |
|    |             | Del          | CDKN2A (-2.8), CDKN2B (-2.8)                                                                                               |          | Del |                                                                                                                                                        | Del |                                                                  |
| 21 | EGFR-KDD    | Mtn          | EGFR-KDD, CTNNB1 T41A                                                                                                      |          | Mtn | KRAS G12A, SMARCB1 R377C, RICTOR E372*, MAX V50_P51del                                                                                                 | Mtn |                                                                  |
|    |             | Amp          |                                                                                                                            |          | Amp |                                                                                                                                                        | Amp |                                                                  |
|    |             | Del          |                                                                                                                            |          | Del |                                                                                                                                                        | Del |                                                                  |
|    |             |              |                                                                                                                            |          |     |                                                                                                                                                        |     |                                                                  |
| 22 | EGFR-KDD    | Mtn          | EGFR-KDD, TP53 D49V, PLK2 I445M                                                                                            |          | Mtn | NF2 V81L                                                                                                                                               | Mtn |                                                                  |
|    |             | Amp          | EGFR (1.5 vs 2.8)                                                                                                          |          | Amp |                                                                                                                                                        | Amp |                                                                  |
|    |             | Del          |                                                                                                                            |          | Del |                                                                                                                                                        | Del |                                                                  |
| 23 | Ex19del     | Mtn          | E746_A750del, APC Q1477*, PIK3R1 D464_Y464del                                                                              | Positive | Mtn | T790M, KDM5C I10006V                                                                                                                                   | Mtn |                                                                  |
|    |             | Amp          |                                                                                                                            |          | Amp |                                                                                                                                                        | Amp |                                                                  |
|    |             | Del          | CDKN2A (-3.9 v -2.7), TP53 del, ETV6 (-4.3 v -3.2)                                                                         |          | Del |                                                                                                                                                        | Del |                                                                  |
| 24 | Ex19del     | Mtn          | E746_A750del, TP53 E180K, SMARCA4 K1044N, JAK1 D388N                                                                       | Positive | Mtn | T790M                                                                                                                                                  | Mtn |                                                                  |
|    |             | Amp          |                                                                                                                            |          | Amp | EGFR (1.6)                                                                                                                                             | Amp |                                                                  |
|    |             | Del          |                                                                                                                            |          | Del |                                                                                                                                                        | Del |                                                                  |
| 25 | Ex18del     | Mtn          | E709_T710delinsD, TP53 P152L, SMAD2 W437_I438insR                                                                          |          | Mtn | STAT5A R778C                                                                                                                                           | Mtn | SMAD2                                                            |
|    |             | Amp          |                                                                                                                            |          | Amp | CCNE1 (2.8), NKX2-1 (4.7), ETV1 (2.7), EGFR (2.9), RAC1 (3.4), AKT1 (4.2), PMS2 (3.4), CARD11 (2.4), IKZF1 (2.2), INHBA (2.2), MAX (5.2), DICER1 (5.1) | Amp |                                                                  |
|    |             | Del          |                                                                                                                            |          | Del | CDKN2A (-6.6), CDKN2B (-14.3), NKX3-1 (-3.0) EPHA7 (-2.0), BRCA2 (-2.9), FOXO1 (-2.9), ERCC5 (-2.8), IRS2 (-3.1), SOX17 (-2.9)                         | Del |                                                                  |
| 26 | L858R       | Mtn          | L858R, PIK3CA C420R, TP53 (G266R), RB1 Y173fs, RHEB V98A                                                                   |          | Mtn | TP53(E56*), ARID1A E1032K                                                                                                                              | Mtn | TP53(G266R), RB1, RHEB                                           |
|    |             | Amp          | FOXA1 (3.9 v 2.4), NKX2-1 (3.9 v 2.4), PTPRT (3.0 v 1.7), ERBB2 (2.4 v), MDM2 (3.1), RICTOR (4.0), IL7R (2.3), MYCL1 (2.6) |          | Amp |                                                                                                                                                        | Amp | ERBB2 (2.4 v), MDM2 (3.1), RICTOR (4.0), IL7R (2.3), MYCL1 (2.6) |
|    |             | Del          |                                                                                                                            |          | Del |                                                                                                                                                        | Del |                                                                  |
| 27 | L858R       | Mtn          | L858R, DOTL1 I232N, YAP1 F385L, MAPK3 R96H                                                                                 |          | Mtn |                                                                                                                                                        | Mtn | MAPK3 R96H                                                       |
|    |             | Amp          | EGFR (2.2 v 3.1), FGFR4 (2.0 v 2.9), NSD1 (2.0 v 2.9), NPM1 (2.0 v 2.9)                                                    |          | Amp | ETV1 92.1), RAC1 (2.5), PMS2 (2.6), CARD11 (3.2), RBM10 (2.7), ARAF (2.0), KDM6A (2.2), Gain: CSF1R (1.8), PDGFRB (1.8)                                | Amp |                                                                  |
|    |             | Del          |                                                                                                                            |          | Del | PIK3R1 loss (-1.8)                                                                                                                                     | Del |                                                                  |
| 28 | L858R E709K | Mtn          | L858R+E709K                                                                                                                |          | Mtn | TP53 M246K                                                                                                                                             |     |                                                                  |
|    |             | Amp          |                                                                                                                            |          | Amp |                                                                                                                                                        |     |                                                                  |
|    |             | Del          |                                                                                                                            |          | Del |                                                                                                                                                        |     |                                                                  |
| 29 | L858R       | Mtn          | L858R, TP53 M246V, RUNX1 L129_T131del                                                                                      | Positive | Mtn | T790M, APC S1100fs, BRIP1 I983fs, FBXW7 C573Y                                                                                                          | Mtn |                                                                  |

|    |         |     |                                                                                                                                                             |          |     |                                                                                                                                                                                      |     |                                                                                                                              |
|----|---------|-----|-------------------------------------------------------------------------------------------------------------------------------------------------------------|----------|-----|--------------------------------------------------------------------------------------------------------------------------------------------------------------------------------------|-----|------------------------------------------------------------------------------------------------------------------------------|
|    |         | Amp |                                                                                                                                                             |          | Amp |                                                                                                                                                                                      | Amp |                                                                                                                              |
|    |         | Del |                                                                                                                                                             |          | Del |                                                                                                                                                                                      | Del |                                                                                                                              |
| 30 | Ex19del | Mtn | E746_A750del<br>CTNNB1 S37C                                                                                                                                 |          | Mtn | PIK3CA E545K, SETD2 C667Lfs,<br>GRIN2A E1176K, PTPRS E957K,<br><u>FGFR3-TACC3 fusion</u> , CDKN1A R84Q,<br>SESN1 rearrangement                                                       | Mtn | CTNNB1 S37C                                                                                                                  |
|    |         | Amp | ERBB2 (2.3 v 2.0), MDM2 (2.6 v 2.4), CDK12<br>(2.3 v 2.0),<br>TERT (2.6 v 3.2)<br>RARA (2.3)                                                                |          | Amp |                                                                                                                                                                                      | Amp | RARA (2.3)                                                                                                                   |
|    |         | Del |                                                                                                                                                             |          | Del | CDKN2A (-1.6)                                                                                                                                                                        | Del | CXCR4                                                                                                                        |
| 31 | Ex19del | Mtn | E746_A750del, PIK3CA E545K, TP53 R196*,<br>SF3B1 K700E, PTPRD M1588I, BCL6 E311D,<br>NSD1 D1419H, FLT3 E800Q, MDM2 P320A,<br>MDM4 I166L                     |          | Mtn |                                                                                                                                                                                      | Mtn | PIK3CA E545K, TP53 R196*,<br>SF3B1 K700E, PTPRD<br>M1588I, BCL6 E311D, NSD1<br>D1419H, FLT3 E800Q, MDM2<br>P320A, MDM4 I166L |
|    |         | Amp | PAX5 (2.2)                                                                                                                                                  |          | Amp |                                                                                                                                                                                      | Amp | PAX5                                                                                                                         |
|    |         | Del | CDKN2A (-1.8), CDKN2B (-2.0)                                                                                                                                |          | Del |                                                                                                                                                                                      | Del | CDKN2A, CDKN2B                                                                                                               |
| 32 | L858R   | Mtn | L858R, TP53 R282W, APC D962fs, MTOR<br>P568S, FLT1 I464V, PDGFRA V859M                                                                                      | Positive | Mtn | T790M                                                                                                                                                                                | Mtn | MTOR, FLT1, PDGFRA                                                                                                           |
|    |         | Amp | TERT (2.2), FOXA1 (3.4), NKX2-1 (3.4), TSHR<br>(2.3), NFKBIA (3.4)                                                                                          |          | Amp | EGFR (3.0), CCNE1 (4.0), AKT2 (4.7),<br>CEBPA (3.3), FGFR4 (3.0), IKZF1 (3.0),<br>NSD1 (3.0), INHBA (3.0)                                                                            | Amp | TERT (2.2), FOXA1 (3.4),<br>NKX2-1 (3.4), TSHR (2.3),<br>NFKBIA (3.4)                                                        |
|    |         | Del |                                                                                                                                                             |          | Del |                                                                                                                                                                                      | Del |                                                                                                                              |
| 33 | Ex19INS | Mtn | I740_P741insSRYYQG, TP53 R248G, ROS1<br>G367V                                                                                                               |          | Mtn | SMYD3 A311V                                                                                                                                                                          | Mtn |                                                                                                                              |
|    |         | Amp | EGFR (9.9 v 1.7),<br>MYC (2.4)                                                                                                                              |          | Amp |                                                                                                                                                                                      | Amp | MYC                                                                                                                          |
|    |         | Del | CDKN2A (-4.7) CDKN2B (-4.7)                                                                                                                                 |          | Del |                                                                                                                                                                                      | Del | CDKN2A                                                                                                                       |
| 34 | Ex19del | Mtn | L747_P753delinsS +A755G, TP53 S269fs,<br>BAP1 P522fs, MED12 R1170G, MDM4 E243V                                                                              |          | Mtn | NOTCH3 M458V, CARD11 R869W                                                                                                                                                           | Mtn |                                                                                                                              |
|    |         | Amp | EGFR (2.2 v 2.1), FOXA1 (1.9), NKX2-1 (1.9),<br>NFKBIA (1.9)                                                                                                |          | Amp | MET (3.7), MYC (2.2), BRAF (1.8)                                                                                                                                                     | Amp | NKX2-1, FOXA1, NFKBIA                                                                                                        |
|    |         | Del |                                                                                                                                                             |          | Del | CDKN2A (-1.7)                                                                                                                                                                        | Del |                                                                                                                              |
| 35 | Ex19del | Mtn | E746_T751delinsA                                                                                                                                            | Positive | Mtn | T790M, APC Q1444*, FAT1 E2052K,<br>ERRF1 K409*                                                                                                                                       | Mtn |                                                                                                                              |
|    |         | Amp |                                                                                                                                                             |          | Amp |                                                                                                                                                                                      | Amp |                                                                                                                              |
|    |         | Del |                                                                                                                                                             |          | Del |                                                                                                                                                                                      | Del |                                                                                                                              |
| 36 | Ex19del | Mtn | E746_A750del, TP53 R337L, ATR D2331Y                                                                                                                        | Positive | Mtn | T790M, KMT2C D2690N, RAD51B<br>L209V                                                                                                                                                 | Mtn | TP53, ATR                                                                                                                    |
|    |         | Amp |                                                                                                                                                             |          | Amp |                                                                                                                                                                                      | Amp |                                                                                                                              |
|    |         | Del |                                                                                                                                                             |          | Del |                                                                                                                                                                                      | Del |                                                                                                                              |
| 37 | L858R   | Mtn | L858R, TP53 C238Y, ARID1B S1246*, GRIN2A<br>T888M, PTPRD E698Q, BRCA2 M1149I, BCOR<br>S1180F, CARD11 ex8-9 splice variant, TBX3,<br>RET, PIK3CB, TAP1, FAT1 |          | Mtn | ERBB3 S781L, AKT1 L213V, FUBP1<br>G395A, RTEL1 ex7 splice, PBRM1<br>Ex28 splice, CARD11 ex8-9 splice,<br>ATRX Q1632K, DROSHA R1075H,<br>MSH6 E899V, FUBP1 G395A, RTEL1<br>ex7 splice | Mtn | TAP1, CARD11 ex8-9 splicing<br>variant, TBX3, PIK3CB, RET,<br>PIK3CB, FAT1,                                                  |
|    |         | Amp | CDK4 (3.3 v 3.0), CCND1 (2.8 v 3.3), EGFR (5.8)                                                                                                             |          | Amp | MET (6.8)                                                                                                                                                                            | Amp | PRKD1 (2.4), FOXA1 (1.8)                                                                                                     |

|    |       |     |                                                                                                                                                                    |  |     |                         |     |
|----|-------|-----|--------------------------------------------------------------------------------------------------------------------------------------------------------------------|--|-----|-------------------------|-----|
|    |       |     | v 6.8),<br>NKX2-1 (1.8 v 2.4), RICTOR (1.9 v 2.1), FGF4<br>(2.8 v 3.3),<br>FGF19 (2.8 v 3.3),<br>FGF3 ( 2.8v 3.3), NFKBIA (1.8 v 2.4), PRKD1<br>(2.4), FOXA1 (1.8) |  |     |                         |     |
|    |       | Del |                                                                                                                                                                    |  | Del |                         | Del |
| 38 | L858R | Mtn | L858R, APC K581fs,RBM10 H842R                                                                                                                                      |  | Mtn | MTOR E2419K, NUP93 E14K | Mtn |
|    |       | Amp |                                                                                                                                                                    |  | Amp |                         | Amp |
|    |       | Del |                                                                                                                                                                    |  | Del |                         | Del |



**Supplemental Figure 1: Relative expression of phosphoryrated proteins in transient cell line model.** 293T cells were transiently transfected with pcDNA3 Flag-mTOR (WT, E2419K, S1483F, S2215F), vector control, or HA-S6K1. Thirty-six hours after the transfection, cells were serum starved overnight and subsequently nutrition starved in PBS for 1 hour. Lysates were subjected to immunoblotting. Band intensities were quantified using ImageJ software, and data are representative of two independent experiments (mean  $\pm$  SE). \*\*\* $p < 0.001$ , compared to the respective WT+S6K group.

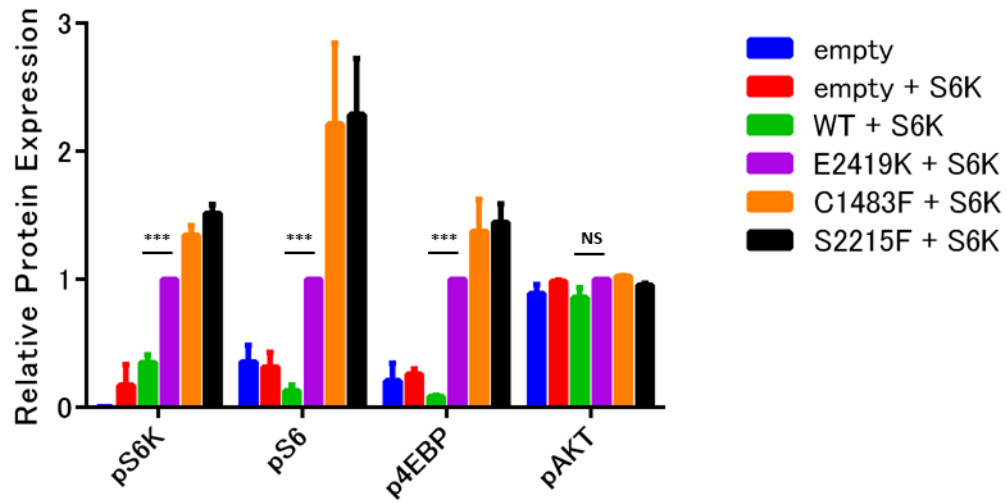

**Supplemental Figure 2: Cell growth and viability of isogenic PC9-mTOR cell line model with erlotinib treatment.**

PC9-mTOR cell lines were treated with erlotinib for 96 hours. Each experiment was assayed in six-replicate determinations and data are representative of three independent experiments (mean  $\pm$  SE).

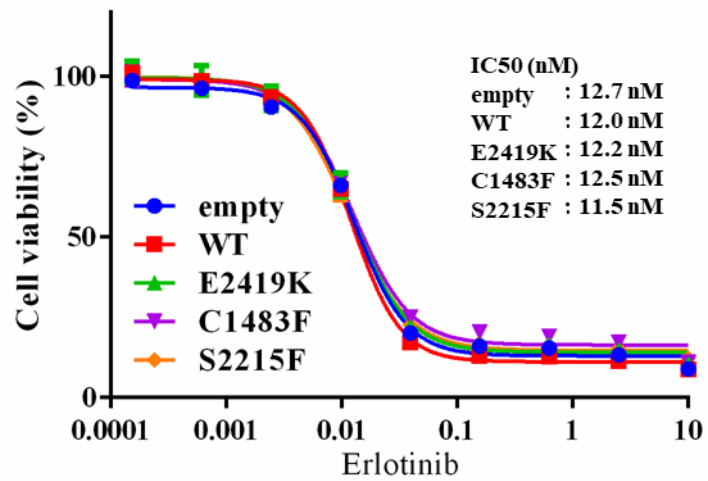

**Supplemental Figure 3: Cell growth and viability of isogenic PC9-mTOR cell line model with AZD8055 treatment.**

PC9-mTOR cell lines were treated with AZD8055 for 96 hours. Each experiment was assayed in six-replicate determinations and data are representative of three independent experiments (mean  $\pm$  SE).

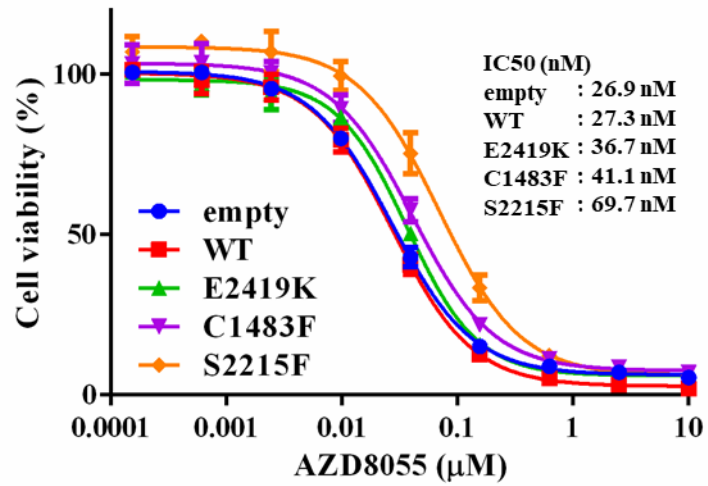

#### Supplemental Figure 4: Changes of body weight

PC9-*mTOR* E2419K cells were implanted subcutaneously into the flank of athymic nude mice. Once tumors reached approximately 100 mm<sup>3</sup>, mice were treated with vehicle, 25 mg/kg erlotinib, 20 mg/kg AZD8055, or a combination of 25 mg/kg erlotinib and 20 mg/kg AZD8055 daily. Body weight was determined on the indicated days after the onset of treatment. Data represent mean  $\pm$  SE (n = 5).

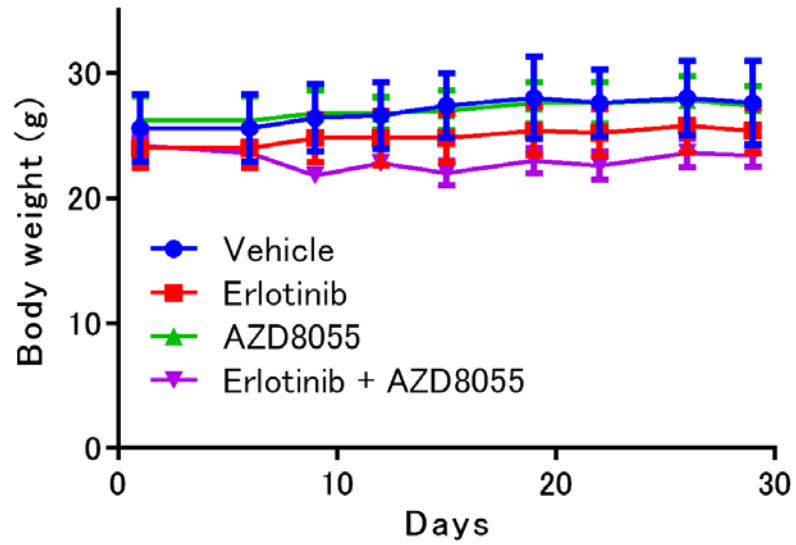

Supplement: NIHMS1519924-supplement-1.pdf [file NIHMS1519924-supplement-1.pdf]
